# Supplementary material for: Matrix metalloproteinase activity in the lung is increased in Hermansky-Pudlak syndrome
Source: Springer Nature journal article supplement (doi:10.1186/s13023-019-1143-0), 2019-07-04
Supplement: MOESM1 [file 16882778]

| Pt Code | Genotype | Age | Gender | Fibrosis | FVC | DLCO | HRCT<br>ILD | Honeycombing | Cysts | GGO |
|---------|----------|-----|--------|----------|-----|------|-------------|--------------|-------|-----|
| V7      | NV       | 56  | M      | no       | 106 | 103  | no          | no           | no    | no  |
| 18a     | NV       | 19  | F      | no       | 103 | 101  |             | no           | no    | no  |
| 26d     | NV       | 32  | M      | no       | 103 | 109  | no          | no           | no    | no  |
| 17f     | HPS-1    | 49  | F      | yes      | 110 | 91   | yes         | no           | no    | no  |
| 294d    | HPS-1    | 43  | F      | yes      | 93  | 50   | yes         | no           | yes   | no  |
| 329b    | HPS-1    | 36  | F      | yes      | 62  | 68   | yes         | no           | no    | yes |
| 362b    | HPS-1    | 55  | M      | yes      | 92  | 76   | yes         | no           | no    | no  |
| 467a    | HPS-1    | 62  | M      | yes      | 81  | 82   | yes         | no           | no    | no  |
| 472b    | HPS-1    | 36  | F      | yes      | 85  | 82   | yes         | no           | no    | no  |
| 84a     | NV       | 29  | M      | no       | 100 | 114  |             | no           | no    | no  |
| 86a     | NV       | 26  | F      | no       | 90  | 84   |             | no           | no    | no  |
| 88a     | NV       | 45  | M      | no       | 104 | 96   |             | no           | no    | no  |
| 876     | NV       | 41  | M      | no       | 125 | 112  |             | no           | no    | no  |
| 18      | NV       | 25  | F      | no       | 113 | 101  | no          | no           | no    | no  |
| 19      | HPS-1    | 38  | F      | yes      | 61  | 85   | yes         | no           | no    | yes |
| 28      | HPS-1    | 44  | M      | yes      | 96  | 66   | yes         | yes          | no    | no  |
| 37d     | HPS-4    | 32  | F      | no       | 61  | 65   | no          | no           | no    | no  |
| 85a     | NV       | 47  | F      | no       | 123 | 101  |             | no           | no    | no  |
| 86a     | NV       | 26  | F      | no       | 90  | 84   |             | no           | no    | no  |
| 91a     | NV       | 29  | M      | no       | 82  | 93   |             | no           | no    | no  |
| 876     | NV       | 41  | M      | no       | 125 | 112  |             | no           | no    | no  |
| 5b      | HPS-1    | 37  | F      | no       | 107 | 86   | no          | no           | no    | no  |
| 20      | HPS-1    | 37  | M      | no       | 95  | 74   | no          | no           | no    | no  |
| 21      | HPS-4    | 62  | F      | yes      | 109 | 75   | yes         | yes          | no    | no  |
| 91a     | HPS-3    | 20  | M      | no       | 97  | 90   | no          | no           | no    | no  |
| 13M     | NV       | 51  | M      | no       | 92  | 77   | no          | no           | no    | no  |
| 85a     | NV       | 47  | F      | no       | 123 | 101  |             | no           | no    | no  |
| 89a     | NV       | 22  | M      | no       | 108 | 91   |             | no           | no    | no  |
| 91a     | NV       | 29  | M      | no       | 82  | 93   |             | no           | no    | no  |
| 4b      | HPS-1    | 37  | F      | yes      | 90  | 54   | yes         | no           | no    | yes |
| 12      | HPS-1    | 37  | F      | yes      | 107 | 61   | yes         | no           | yes   | no  |
| 17      | NV       | 43  | F      | no       | 81  | 85   | no          | no           | no    | no  |
| 78a     | HPS-1    | 49  | M      | yes      | 61  | 46   | yes         | yes          | no    | yes |
